# 1                   **Sexual conflict mitigation via sex-specific trait architecture**

2   **Author list:** Simona Kralj-Fišer<sup>a1\*</sup>, Matjaž Kuntner<sup>a,b</sup>, Paul Vincent Debes<sup>c1</sup>

3   <sup>1</sup> Equal contributions

4   **Correspondence:** \* [simona.kralj-fiser@zrc-sazu.si](mailto:simona.kralj-fiser@zrc-sazu.si)

5   **Affiliations:** <sup>a</sup> ZRC SAZU, Institute of Biology, 1000 Ljubljana, Slovenia, <sup>b</sup> Department of Organisms and  
6   *Ecosystems Research, National Institute of Biology, 1000 Ljubljana, Slovenia,* <sup>c</sup> Department of Aquaculture  
7   *and Fish Biology, Hólar University, 550 Sauðárkrókur, Iceland*

8   **ORCID:**

9   Simona Kralj-Fišer: <https://orcid.org/0000-0001-6604-2332>

10   Matjaž Kuntner: <https://orcid.org/0000-0002-0057-2178>

11   Paul V Debes: <https://orcid.org/0000-0003-4491-9564>

12   **Running title:** Trait architecture and sexual conflict

13   **Keywords:** sexual conflict, sexual-size dimorphism, maternal effects, trait architecture, quantitative  
14   genetics.

## 15 **Abstract**

16 Sexual dimorphism — the sex-specific trait expression — may emerge when selection favours different  
17 optima for the same trait between sexes, i.e., under antagonistic selection. Intra-locus sexual conflict  
18 exists when the sexually dimorphic trait under antagonistic selection is based on genes shared between  
19 sexes. A common assumption for sexual-size dimorphism (SSD) is that its presence indicates resolved  
20 sexual conflict, but how current sex-specific evolution proceeds under sexual dimorphism remains  
21 enigmatic. We investigated whether a sex-specific architecture of adult body size explains sexual conflict  
22 resolution under extreme SSD in the African hermit spider, *Nephilingis cruentata*, where adult female  
23 body size greatly exceeds that of males. Specifically, we estimated the sex-specific importance of genetic  
24 and maternal effects on adult body size among individuals that we laboratory-reared for up to eight  
25 generations. Quantitative genetic model estimates indicated that size variation in females is to a larger  
26 extent explained by direct genetic effects than by maternal effects, but in males to a larger extent by  
27 maternal than by genetic effects. We conclude that this sex-specific body-size architecture enables body-  
28 size evolution to proceed much more independently than under a common architecture to both sexes,  
29 thereby mitigating sexual conflict under SSD.

## 30 Introduction

31 Sexual dimorphism, the between-sex trait difference in a trait, exists in many animals. How evolution of  
32 existing sexually dimorphic traits may proceed has long been a mystery to researchers [1]. Specifically,  
33 selection may favour sex-specific optima in the same trait, generating antagonistic selection between the  
34 sexes, and this trait may be determined by shared genes between the sexes, defining intra-locus sexual  
35 conflict [2-4]. Sexual conflict and its mitigation, or resolution, not only play an important role in the  
36 evolutionary emergence of sexual dimorphism and have far-reaching effects on genomic organization and  
37 speciation, but also on processes that act on medium to short scales, such as population dynamics or  
38 extirpation [5-11]. It may thus not be surprising that elucidating how sex-specific evolution of sexually  
39 dimorphic traits proceeds has been subject to much past and current research [3, 12-16].

40 Sexual dimorphism in size, termed sexual-size dimorphism (SSD), may have resulted from sex  
41 differences in the optimal body size relating to either parental investment or mating success [1, 14, 17].  
42 Specifically, anisogamy – the differences between sex-specific gametes – often requires higher energetic  
43 investment by females to produce eggs (or offspring) than sperm cells produced by males [17, 18]. SSD  
44 with females as the larger sex (female-biased SSD) may then have emerged in systems in which female,  
45 but not male, body size affects offspring size and number [1, 19-21]. However, the genetic and molecular  
46 mechanisms that allow sex-specific evolution of sexually dimorphic traits remain largely unknown,  
47 although it is often assumed that the presence of SSD implies at least partly resolved sexual conflict [3,  
48 14, 20]. A common assumption is that sexual-conflict resolution involves a decoupling of the genetic  
49 architecture between the sexes [11, 22].

50 Exactly how decoupling of the genetic architecture between sexes proceeds to allow for an  
51 independent evolution of the sexes is subject to current research. Theoretically, sexual conflict can be  
52 resolved by mechanisms leaving distinct signatures that can be detected using quantitative genetic  
53 methods. Specifically, a resolution may lead to detecting heterogeneous direct genetic variances between

54 sexes or a low between-sex genetic correlation [6]. However, the between-sex genetic correlation may  
55 often, but not always, predict the degree of sexual dimorphism [16, 23] making it worthwhile to consider  
56 resolving mechanisms involving effect levels other than the direct genetic, such as the maternal effect  
57 level [24, 25]. Maternal effects, i.e., causal influences of the maternal phenotype on the offspring  
58 phenotype other than that of her directly transmitted genetic variants, may vary with maternal  
59 environment or maternal genetics [26-29]. Whereas maternal *environmental* effects on offspring are  
60 controlled by the maternal environment on a maternally expressed trait, maternal *genetic* effects on  
61 offspring are controlled by direct genetic effects on a maternally expressed trait. Only the latter effects  
62 are heritable. Sex-specific maternal effects, although empirically associated with sexual dimorphism in  
63 only a few cases [30-32], have long been considered theoretically in selection for sexual dimorphism [33]  
64 and more recently in the resolution of sexual conflict [24, 25]. Importantly, if variation for body size  
65 between the sexes underlies different relative contributions of maternal and direct genetic effects, this  
66 would enable resolving, or at least mitigating, sexual conflict over body size and thus maintaining SSD  
67 while allowing for sex-specific evolution of body size.

68 Here, we examined sex-specific adult body size variation in the African hermit spider, *Nephilingis*  
69 *cruentata*, which expresses an extremely female-biased SSD [34, 35]. We reared spiders for up to eight  
70 generations under standardized laboratory conditions, measured 2,540 pedigreed individuals, and tested,  
71 using quantitative genetic methods, whether the relative contributions by direct genetic and maternal  
72 effects to adult body mass variation differed between sexes. Our results suggest that variation in adult  
73 body mass is explained to a larger extent by direct genetic effects in females and to a larger extent by  
74 maternal effects in males, whereby direct genetic effects may play a minor role on size variation of males.  
75 Our results support the presence of a relatively straightforward mechanism that mitigates intra-locus  
76 sexual conflict and allows for a less constrained sex-specific evolution of adult body size than under a  
77 common body size architecture.

## 78 **Results**

79 **Adult body size varies with season**

80 We first evaluated whether the day of the year when spiderlings hatched affected their adult body size,  
81 because adult body size of many spiders is influenced by seasonal environmental factors [35-37]. We were  
82 concerned that unaccounted seasonal effects across the six years of rearing, but common to concurrently  
83 hatching siblings, might be confounded with (other) maternal effects. The results of a mixed model  
84 accounting for relatedness via the inverse of the additive genetic relatedness matrix and maternal effects  
85 via mother identification indicated that adult body mass indeed associated with hatching season in both  
86 sexes (**Figure 1, Table 1**). Specifically, individuals hatched during summer were larger than those hatched  
87 during winter, whereas individuals hatched during spring and autumn expressed intermediate body sizes.  
88 Further, average adult body size increased with decreasing daylength when hatched in summer and  
89 decreased with increasing daylength when hatched in winter.

90 **Figure 1**

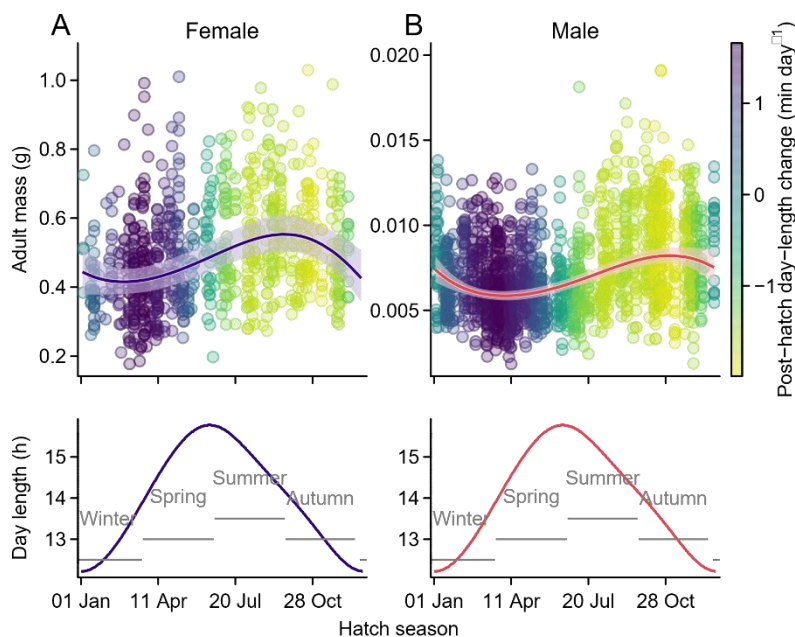

91  
92 Seasonal change of adult body mass. Model-predicted trends of adult body mass in female (**A**,  $n = 789$ )  
93 and male (**B**,  $n = 1,751$ ) hermit spiders across seasons (when hatched). Lines with 95% confidence bands  
94 represent the 3<sup>rd</sup> order polynomial model fit for adult mass across hatching day of year in females (purple)  
95 or males (red). Points represent individual measurements with colour indicating the average change in  
96 daylength during the first seven days after hatching. Effective daylength per day and seasons are shown  
97 in the bottom panels.

98

99 Using the same mixed model, we tested whether feeding prospective mothers one fly (low food  
100 treatment) or three flies (high food treatment) twice per week after mating affected adult body size of  
101 their daughters or sons, thereby testing for sex-specific maternal *environmental* effects related to  
102 maternal food amount. We did not detect convincing evidence that the maternal food amount affected  
103 body size of offspring of either sex. Specifically, both the main and interaction terms of the maternal food  
104 treatment with sex were non-significant (**Table 1**). Daughters from high-food mothers were estimated to  
105 be only 1.07 times (95% confidence interval, 95% CI: 0.97-1.18 times) larger compared with daughters  
106 from low-food mothers, and this difference was non-significant ( $t_{291.2} = 1.30$ ,  $P = 0.197$ ). Sons from high-  
107 food mothers were estimated to be of very similar size to sons from low-food mothers, specifically just  
108 1.01 times (95% CI: 0.93-1.10 times) larger, which was also non-significant ( $t_{291.2} = 0.21$ ,  $P = 0.834$ ).

109 **Table 1.** ANOVA table for fixed effects in the mixed model for adult body mass of female and male spiders.

| <b>Term</b>                             | <b>DF</b> | <b>DDF</b> | <b>F</b> | <b>P</b> |
|-----------------------------------------|-----------|------------|----------|----------|
| <i>Sex</i>                              | 1         | 12.5       | 9818     | < 0.001  |
| <i>Period</i>                           | 1         | 106.1      | 1        | 0.424    |
| <i>Sex-by-Period</i>                    | 1         | 145.7      | 4        | 0.057    |
| <i>Maternal food</i>                    | 1         | 291.2      | 1        | 0.364    |
| <i>Sex-by-Maternal food</i>             | 1         | 288.3      | 1        | 0.357    |
| <i>Date</i> , polynomial order 1        | 1         | 240.8      | 82       | < 0.001  |
| <i>Date</i> , polynomial order 2        | 1         | 260.8      | 0        | 0.560    |
| <i>Date</i> , polynomial order 3        | 1         | 262.6      | 32       | < 0.001  |
| <i>Sex-by-Date</i> , polynomial order 1 | 1         | 200.5      | 1        | 0.475    |
| <i>Sex-by-Date</i> , polynomial order 2 | 1         | 233.8      | 12       | < 0.001  |
| <i>Sex-by-Date</i> , polynomial order 3 | 1         | 205.4      | 0        | 0.777    |

110 Terms: *sex* (female, male), *Period* relative to introducing the maternal food treatment (before, after),  
111 *Maternal food* after reaching adulthood (high, low), *Date* as day of year when hatched (continuous: 1-  
112 366); DF: degrees of freedom; DDF: denominator degrees of freedom. The *Period* term was fitted to  
113 enable a direct testing of the *Maternal food* level high-low contrast and its interaction with *Sex*.

114 **Body size architecture differs between sexes**

115 Controlled for sex, hatching season, and maternal food treatments, we observed opposite importance  
 116 between sexes for direct genetic vs. maternal proportional contribution-estimates to variation for adult  
 117 body mass (heritability,  $\hat{h}^2$ , and  $\hat{m}^2$ , respectively; **Figure 2**; (co)variances in **Table 2**).

118 **Table 2.** Sex-specific variance estimates of adult body mass for either females (F) or males (M), and  
 119 between-sex covariance estimates, for maternal (*dam*), direct genetic (*animal*), or residual effects by  
 120 either REML or parametric bootstraps.

| Term                                  | REML     |        | Boot     |        | 2.50%   | 97.50% |
|---------------------------------------|----------|--------|----------|--------|---------|--------|
|                                       | Estimate | SE     | Estimate | SE     |         |        |
| <i>dam</i> , $\hat{\sigma}_F^2$       | 0.0104   | 0.0041 | 0.0102   | 0.0038 | 0.0032  | 0.0182 |
| <i>dam</i> , $\widehat{cov}_{F,M}$    | 0.0080   | 0.0031 | 0.0077   | 0.0029 | 0.0022  | 0.0134 |
| <i>dam</i> , $\hat{\sigma}_M^2$       | 0.0246   | 0.0042 | 0.0234   | 0.0037 | 0.0163  | 0.0308 |
| <i>animal</i> , $\hat{\sigma}_F^2$    | 0.0213   | 0.0084 | 0.0224   | 0.0087 | 0.0066  | 0.0411 |
| <i>animal</i> , $\widehat{cov}_{F,M}$ | -0.0002  | 0.0048 | 0.0005   | 0.0045 | -0.0079 | 0.0099 |
| <i>animal</i> , $\hat{\sigma}_M^2$    | 0.0014   | 0.0054 | 0.0043   | 0.0039 | 0.0000  | 0.014  |
| <i>residual</i> , $\hat{\sigma}_F^2$  | 0.0514   | 0.0054 | 0.0510   | 0.0055 | 0.0398  | 0.0615 |
| <i>residual</i> , $\hat{\sigma}_M^2$  | 0.0720   | 0.0037 | 0.0706   | 0.0033 | 0.0638  | 0.0768 |

121 Specifically, in females (*F*), direct genetic effects made up 26% of the phenotypic variance, but  
 122 maternal effects made up only 13%, and the lower confidence interval for both estimates were well away  
 123 from zero. In contrast, in males (*M*), direct genetic effects made up only 1% of the phenotypic variance,  
 124 whereas the maternal effect variance made up 25%, and the lower confidence interval of the former but  
 125 not the latter approached zero. This opposite importance between sexes for relative amounts contributed  
 126 by genetic (*a*) vs. maternal (*m*) effects on variation of body size phenotype expression was supported by  
 127 the 95% confidence intervals for the between-sex contrasts of heritability and the maternal proportional  
 128 variance contribution that both excluded zero (**Figure 2**; see tests on variance differences below). Under  
 129 sex-specific optima of the same trait, sexual conflict may be detected by a high and positive genetic  
 130 correlation between the sexes, as it can constrains the sex-specific evolution of a trait by inducing  
 131 correlated selection responses of the two sexes [6, 38, 39]. The between-sex correlation estimates for the

132 direct additive genetic correlation ( $\hat{R}_{a,F,M}$ ) showed, albeit estimated as close to zero, a wide confidence  
133 interval spanning both negative and positive values (**Figure 2**). This, however, is not unexpected when  
134 male direct genetic effect estimates have a large uncertainty relative to their estimates (i.e., under a low  
135 genetic variance; **Table 2**), so that their ranking and thus correlation with the female effects is uncertain.  
136 However, the between-sex correlation estimate for maternal effects ( $\hat{R}_{m,F,M}$ ) and its 95% confidence  
137 interval were positive, indicating that maternal effects are – despite showing a differential relative  
138 importance – shared to some extent between sexes.

139 **Figure 2.**

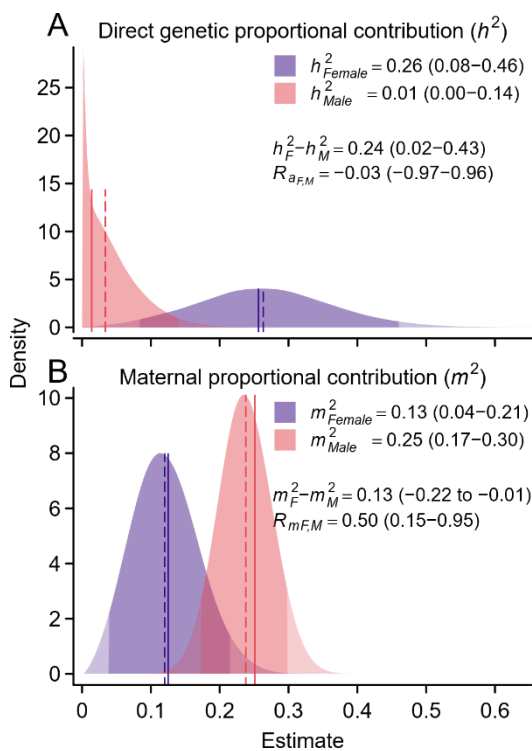

140

141 Sex-specific body size architecture. Sex-specific estimates of proportional contribution to the phenotypic  
142 variance of adult body mass by direct genetic effects ( $h^2$ ; **A**) and maternal effects ( $m^2$ ; **B**) in female (purple;  
143 *F*) and male (red; *M*) African hermit spiders. Means were estimated by REML, whereas the 95% confidence  
144 intervals for each distribution, indicated by a stronger colour saturation, were estimated across 10,000  
145 parametric bootstrap replicates. REML means and bootstrap medians are indicated by vertical solid and  
146 dashed lines, respectively.

147 Comparisons of estimates for the proportional contribution to the phenotypic variance, such as  $\hat{h}^2$ ,  
148 and  $\hat{m}^2$ , may not fully reflect the differences in evolvability [40], but instead for log transformed trait data



149 the differences in genetic variance estimates may be preferred [41]. Therefore, we tested the hypotheses  
150 of sex differences in variance estimates using likelihood ratio tests between the model with sex-specific  
151 variances and each of three nested models in which we constrained genetic, maternal, or residual variance  
152 to be the same for the sexes. We found the model fitting different genetic variances between sexes (15.5  
153 times larger for females) to be better than the model fitting a genetic variance constrained to be the same  
154 for the sexes ( $\chi^2_1 = 4.16$ ,  $P = 0.021$ ). This leads to the expectation that a proportional response (i.e.,  
155 considering the different absolute body sizes between sexes) to a selection gradient with identical values  
156 for the sexes on the log scale would incur a larger response for females than males. In addition, we found  
157 the model with sex-specific maternal variances (2.4 times for males) and residual variances (1.4 times  
158 larger for males) to fit better than models fitting each of these variances constrained to be the same for  
159 the sexes ( $\chi^2_1 = 5.43$ ,  $P = 0.010$  and  $\chi^2_1 = 9.84$ ,  $P < 0.001$ , respectively).

160 We also tested how much the included fixed effects (hatching season, maternal food treatment)  
161 affected the proportional contribution and variance estimates. Not controlled for hatching season,  
162 heritability estimates decreased slightly in females and increased slightly in males ( $\hat{h}_F^2$ : changed from 26%  
163 to 18%;  $\hat{h}_M^2$ : 1% to 3%), and the uncertain between-sex genetic correlation estimate decreased  
164 considerably ( $\hat{R}_{aF,M}$ : -0.03 to -0.88), whereby the latter may have been a statistical consequence of the  
165 abovementioned low male effect variance. In contrast, the proportional contribution of maternal variance  
166 increased – as expected – in both sexes ( $\hat{m}_F^2$ : 13% to 25%;  $\hat{m}_M^2$ : 25% to 32%). The changes in proportional  
167 contributions were caused by slightly lower and higher direct genetic variance estimates in females and  
168 males, respectively, and noticeable higher maternal variance estimates in both sexes when not accounting  
169 for hatching season (electronic supplementary material, **Appendix 1 - figure 4**). Along with increased  
170 maternal effect variance, the between-sex correlation for maternal effects increased ( $\hat{R}_{mF,M}$ : from 0.50  
171 to 0.69). We thus confirmed that non-controlled hatching-season effects manifest, statistically, as  
172 common environmental effects that are correlated between sexes (detected in simultaneously hatching  
173 siblings as maternal environmental effects) and contribute about 7-12% to the phenotypic variance. Not

174 controlled for the maternal food treatment (i.e., pooling high and low treatments), the proportional  
175 contribution of direct genetic and maternal effects to the phenotypic variance mirrored estimates  
176 obtained when the treatments were controlled for, except for a somewhat lower female heritability ( $h_F^2$ :  
177 from 26% to 24%) caused by a somewhat lower direct genetic variance in females (electronic  
178 supplementary material, **Appendix 1 - figure 4**). Likewise, the between-sex correlations for genetic and  
179 maternal effects were comparable to the estimates by the full model ( $\hat{R}_{a_{F,M}}$ : from -0.03 to -0.07;  $\hat{R}_{m_{F,M}}$ :  
180 0.50 to 0.48). We thereby confirmed the results obtained when testing maternal food treatments as fixed  
181 effects and gathered evidence that the maternal food treatments may have had little (or no) effects on  
182 the maternal variance estimates of either sex.

## 183 **Discussion**

184 We here inferred that adult body size variation in a non-model species with extreme sexual-size  
185 dimorphism (SSD) is explained to a larger extent by direct genetic effects in the larger females and to a  
186 larger extent by maternal effects in the ~75 times smaller males for which direct genetic effects appeared  
187 to play a minor or no role on size variation. These results on a spider species support the hypothesis that  
188 sexual conflict can be resolved, and SSD maintained while allowing for current sex-specific evolution  
189 through sex-specific trait architecture. Simply put, the documented architecture of adult body size implies  
190 that size variation in daughters underlies to a large share by the directly inherited alleles from both  
191 parents. In contrast, adult body size variation in sons appears to underlie little on the directly inherited  
192 alleles from either parents that are expressed in the offspring. Instead, adult body size architecture of  
193 males appears to be influenced by an unknown trait expressed in their mother (or of common  
194 environmental effects to siblings from the same egg sac), and this maternal trait may or may not have a  
195 direct genetic basis in the mother. Regardless of whether the maternal effect has a direct genetic basis in  
196 the mother, to the offspring it acts as an environmental effect independent of the genes inherited by  
197 either parent [29]. The genes inherited by both parents may have a low importance on adult male size  
198 variation, as we estimated both a low heritability and a low log-scale direct genetic variance. This sex-

199 specific architecture of adult body size, altogether, implies a resolved intra-locus conflict that allows size  
200 evolution to proceed at the direct genetic level in females, with minor consequences on male size. These  
201 results on quantitative genetic parameters provide evidence how intra-locus sexual conflict can be  
202 mitigated or even resolved by sex-specific architecture and thus explain how evolution toward sex-specific  
203 optima of the same trait is possible while maintaining sexual dimorphism.

204 A sex-specific trait architecture is one of several mechanisms circumventing the genetic constraints  
205 imposed when a single sexually dimorphic trait underlies shared genes between sexes, i.e., to resolve  
206 intra-locus sexual conflict. Proposed mechanisms also comprise effects beyond direct genetic inheritance,  
207 including maternal effects [24, 30, 32, 42]. However, empirical studies have remained scarce and provided  
208 only limited evidence for sex-bias in maternal effects on sexually dimorphic traits [30, 43-46]. In the  
209 current study, maternal effects explain 13% of the phenotypic variance (i.e.,  $m^2$ ) of adult body size in  
210 females. In contrast, in males the estimate was 25% and likelihood ratio tests indicated that the maternal  
211 variance estimates (adjusted for size differences) were larger in males than females. In addition to this  
212 relatively small sex-bias for variation in maternal effects, we detected a substantial sex-bias for variation  
213 in direct additive genetic effects. Variation in direct genetic effects explained 26% of the phenotypic  
214 variance (i.e.,  $h^2$ ) in females, which was considerably higher than the estimated 1% in males. A likelihood  
215 ratio test indicated here that the log-scale genetic variance estimate was larger in females than males,  
216 suggesting a higher evolvability by direct genetic effects in females than males. Together, these empirical  
217 results support the idea that sex-specific evolution under extreme SSD is possible through differences in  
218 trait architecture between the sexes. In our case, the architecture of adult body size involves direct genetic  
219 effects predominantly in females, and maternal effects in both sexes, whereby the latter appeared less  
220 important in females than in males. Nonetheless, the results also suggested the presence of a positive  
221 between-sex maternal correlation, which we estimated with large uncertainty. It therefore remains  
222 unclear whether a sex-specific evolution via maternal effects — if these are maternal genetic effects — is  
223 constraint. Regardless of such a possible genetic constraint at the maternal level, the direct genetic effects

224 on body size remain largely restricted to females.

225       A major question emerging from the results is whether the estimated maternal contribution to adult  
226 body size is governed by environmental, genetic, or both effects. Using model selection, we concluded  
227 maternal *environmental* effects to fit the data slightly better than maternal *genetic* effects (electronic  
228 supplementary material, Model selection), but using data simulations we were unable to fully disentangle  
229 these effects from each other (electronic supplementary material, Data simulation, **Appendix 1 - figure**  
230 **3**). However, the type of maternal effect underlying a trait matters regarding the mechanisms controlling  
231 its evolution [26, 29, 46, 47] and may, or may not, encompass the abovementioned constraints on sex-  
232 specific evolution via shared genes. Specifically, under maternal environmental determination, the  
233 maternal contribution to the adult body size variation of her offspring depends on the environmental  
234 conditions experienced by her, which is usually assumed to be independent of the direct genetic  
235 determination of her own body size. In contrast, under maternal genetic determination, the maternal  
236 contribution to the adult body size variation of offspring depends on allelic variants inherited by both of  
237 the parents of the mother (i.e., the grand-parents of an individual) and follows a predictable but by one  
238 generation lagged pattern of inheritance and thus response to selection [29]. Perhaps more important for  
239 resolving sexual conflict under this scenario, sex-specific maternal genetic and direct genetic effects may  
240 be subject to similar mechanisms that constrain sex-specific evolution under a direct genetic architecture  
241 for both sexes. In detail, if adult body size is determined by direct genetic effects in females ( $a_F$ ) and by  
242 maternal genetic effects in males ( $mg_M$ ), the between-sex correlation of these effects ( $R_{a_F, mg_M}$ ) may still  
243 point towards an intra-locus sexual conflict because it may indicate shared genes between sexes at the  
244 direct genetic and maternal genetic levels [26, 48]. An example would be when the maternal adult body  
245 size (controlled by direct genetic effects) affects the maternal genetic effects on adult body size of her  
246 sons (controlled by maternal genetic effects). However, when we fitted a more complex (but less  
247 supported) model that estimated this correlation (electronic supplementary material, **Appendix 1 -**  
248 **figures 1, 2**), it was estimated to be close to and not different from zero ( $\hat{R}_{a_F, mg_M} \pm se = 0.03 \pm 0.16$ ).

249 Assuming a maternal genetic rather than environmental contribution to male adult body size variation,  
250 this low or zero between-sex correlation indicates that different gene sets expressed in different  
251 generations (mothers vs. offspring) are the major genetic determinants of sex-specific adult body size and  
252 that intra-locus sexual conflicts are thus probably largely resolved.

253 Our results also suggest that sex chromosomes, which determine sex in spiders and have long been  
254 thought to play important roles in sexual conflict [15, 49], may here not be very strong candidates for  
255 explaining the differences in adult body size architecture between sexes. In the studied spider species,  
256 the  $X_1X_20$  sex-chromosome system prevails [50], which is the most common system in spiders [51]. Under  
257 this system, sons inherit one chromosome pair from only the mother (i.e.,  $X_1X_2$ ), but daughters inherit one  
258 chromosome pair each from both the mother and the father (i.e.,  $X_1X_1X_2X_2$ ). Thus, recombination is  
259 possible in heterozygotic females but not in hemizygotic males (no recombination is assumed to occur  
260 between  $X_1$  and  $X_2$ ). According to this pattern of inheritance and recombination, the non-recombined sex  
261 chromosome pair passed on by the father to only daughters may be expected to leave quantitative genetic  
262 signatures of female-limited *paternal* genetic effects. Likewise, the recombined sex chromosome pair  
263 passed on by the mother to daughters *and* sons may be expected to leave signatures of similar direct  
264 genetic effects that are correlated between sexes. Whereas the first expectation is difficult to test with  
265 our data (like for *maternal* genetic effects), at least the latter expectation is inconsistent with the main  
266 sex differences in trait architecture inferred here.

267 To more easily predict evolution of male adult body size under influence of maternal effects, the  
268 actual female trait underlying the maternal effects may be identified. The female trait associated with the  
269 maternal effects on male (and to some extent female) adult body size in this study remains unknown, did  
270 not appear to relate to female food amount after reaching adulthood, but may relate to other known  
271 maternal traits that affect offspring size, such as variation in egg quality or size, or amount of egg-  
272 deposited RNA or hormones [26, 52]. Regardless of what the unknown maternal trait is, another  
273 important question is why adult body size of daughters appears less affected by them. A relatively simple

274 mechanism may relate to the sex-specific developmental durations. In detail, we estimated that females  
275 take more than twice as long as males to reach adulthood, namely 219 days in females vs. 90 days in  
276 males. Because importance of maternal effects often declines during ontogeny [45, 53], the contribution  
277 of maternal effects to adult body size may be expected to be greater in sons than daughters as a simple  
278 consequence of the shorter developmental duration to reach the same developmental stage [33, 35].

279 For spiders, molecular developmental aspects in the control of sexual dimorphism remain largely  
280 unknown but have been suggested as promising candidates to provide results that will enrich our  
281 understanding of the underlying mechanisms [54]. However, even though an influence of sex-specific  
282 developmental duration on general SSD prevails in insects [55], effects of the differences in  
283 developmental duration on differences in trait architecture, as may exist here (direct genetic vs.  
284 maternal), do appear to have rarely been linked conceptually [35]. Thus, our results also suggest that  
285 adding aspects of sex-specific direct genetic vs. maternal effects to studies of the molecular  
286 developmental control of SSD may pave future research avenues to an understanding of the molecular  
287 mechanisms that enable sex-specific evolution of sexually dimorphic traits.

## 288 **Materials and methods**

### 289 **Study population, mating design, rearing and maternal food treatment**

290 The studied population of the African hermit spider (*N. cruentata*), a species of IUCN least concern [56],  
291 has been maintained at the Institute of Biology ZRC SAZU, Slovenia since 2015. It was founded by 23 wild  
292 females collected either already gravid in 2015 in iSimangaliso Wetland Park and Ndumo Reserve, South  
293 Africa (permit number OP 552/2015 from Ezemvelo KZN Wildlife), or as virgins in 2018, and one virgin  
294 male collected in 2018 in iSimangaliso (continuous permit number OP 3031/2020). In *Nephilingis*, both  
295 sexes possess paired genitalia and during copulation the used male palp (genitalia) breaks off within the  
296 female's genital opening, impeding re-mating with the used genitalia [57], and limiting the possible  
297 individual copulations to two [37]. Although females may practice sexual cannibalism, it is common for a

298 male to guard a subadult female against suitors prior to maturity and after copulation. Mating of both  
299 sexes is thus usually limited to one partner (monogamy) [37, 57]. For gravid wild females, we therefore  
300 assumed single male partners. In the laboratory, we mated spiders randomly but avoided full- or half-sib  
301 matings. Mating in *N. cruentata* usually involves individuals hatched at different times (of different age)  
302 because of a much shorter developmental time, and thus generation time, of males than females [35].  
303 We mated all females, except one, with one male each, and 43 males successfully with two females each,  
304 and all others with one female each. The final pedigree spans eight generations, encompasses 318  
305 mothers and 273 fathers (including unknown wild ‘phantom’ partners of the gravid wild females) and  
306 contains altogether 2,768 entries. Using the R-package purgeR [58], we estimated the pedigree-based  
307 effective population sizes ( $N_e$ ) and average inbreeding coefficient ( $\hat{F}_i$ ) across the last two generations  
308 (generations seven and eight) as  $N_e = 62.5$  and  $F_i = 0.048$ , respectively.

309 For pairwise mating, we placed an adult female in a poly(methyl methacrylate) frame (35 x 35 x 12  
310 cm) to build a web up to seven days before we added a male using a paint-brush. Because *Nephilingis*  
311 males generally mate opportunistically and approach females when disturbed, we placed two to three  
312 blow flies (*Lucilia sericata*) on the web for disturbance about 15 minutes after trial commenced. We  
313 concluded mating success within 60 minutes, when we placed the female back in her holding plastic cup  
314 (see below) and checked for a newly laid egg sac thrice per week. We carefully placed each predominantly  
315 first-laid egg sac (for six females we also used the second-laid egg sac due to low survival from the first  
316 egg sac) into a 200 ml vial with foam cover, which we sprayed twice a week until hatching. In many species,  
317 newly hatched spiderlings remain aggregated before dispersal [59], which appeared crucial for survival in  
318 *Nephilingis* [35]. After two weeks of communal rearing (which may have introduced common  
319 environmental effects among siblings; see below), we randomly took 20 spiderlings from each full-sib  
320 family and transferred them to single-rearing cups, where we monitored each individual five times per  
321 week for moults.

322 For single-rearing of individuals, we used upside down transparent plastic cups (250 ml) with a

323 cotton-filled hole on the top for air and water exchange. Twice a week, we sprayed the cotton with water  
324 and fed the spiders. Specifically, all males and female juveniles up to the 4<sup>th</sup> moult were fed *ad libitum*  
325 with *Drosophila sp.*, whereas females between the 4<sup>th</sup> and 6<sup>th</sup> moult (i.e., two or one moults before  
326 reaching maturity; absolute number of moults to maturity vary) were fed blow flies. Females that were  
327 one to two moults before maturity were fed two flies, whereas adult females received two or three flies  
328 during the first three years of laboratory rearing (see below for thereafter). In the laboratory, we  
329 controlled both the temperature (mean = 25 °C, sd = 2 °C) and the light:dark regime (12:12 h). However,  
330 some natural light reached the vials (resulting light regime in **Figure 1**).

331 To test for sex-specific maternal environmental effects, we applied a food treatment during the last  
332 three of the total six years of the experiment. In spiders, vitellogenesis occurs predominantly after mating  
333 and only in the presence of sufficient food supply [60]. Thus, we mated females within the first three  
334 weeks after reaching maturity and subjected them to two maternal food treatments thereafter by feeding  
335 them either one (low food) or three flies (high food) twice per week.

### 336 **Traits assessed**

337 Between December 2017 and October 2022, we recorded data on adult body mass for 2,540 individuals  
338 (789 females, 1,751 males). More data for males were recorded because more males than females  
339 survived to adulthood, likely due to the much shorter male developmental time. After reaching sexual  
340 maturity, defined by the final moult, somatic growth of both sexes stops but mass may change thereafter  
341 (via body condition). We therefore defined adult body size as mass expressed within two days after  
342 reaching sexual maturity. We quantified individual adult body size as mass using an analytical balance  
343 (KERN ABT-100-5NM; d = 0.00001 g, e = 0.001 g, min = 0.001 g, repeatability = 0.00005 g) located on an  
344 anti-vibration table and calibrated before each use.

### 345 **Statistical analyses**

346 We were preliminarily interested in the sex-specific relative importance of direct genetic vs. maternal



347 effects on phenotypic variance of adult body size. We were further interested in how strongly these  
348 effects are correlated between sexes. To obtain estimates of the required (co)variances, we fitted animal  
349 models to adult body size data. The animal model is a mixed model that direct additive genetic or maternal  
350 genetic effects (and estimates their variance) via the additive relationships matrix ( $A$ ) and allows  
351 simultaneous estimates of fixed effects via generalized least squares solutions [61]. It is possible to  
352 statistically separate direct genetic from maternal effects when data exist on related individuals from  
353 different mothers [28] and quality of this separation ability depends on size and structure of the pedigree  
354 [62]. Further, it is possible to separate maternal environmental from maternal genetic effects and to also  
355 estimate the covariance between direct genetic and maternal genetic effects, but data and pedigree  
356 requirements increase. In our case, we anticipated to estimate direct genetic and maternal effect  
357 variances separately per sex, plus all the possible covariances, thereby increasing data structure  
358 requirements, so that we first established what kind of variance model is supported by our data and  
359 pedigree structures. We did so by combining approaches of i) model selection among several candidate  
360 models, which varied in how we specified the maternal effect variance and whether we included direct-  
361 maternal genetic effect covariances, and ii) by data simulations (electronic supplementary material,  
362 model selection, data simulations, **Appendix - figures 1-3**).

363 Using simulations, we were not fully able to separate maternal environmental from maternal  
364 genetic effects (electronic supplementary material, **Appendix 1 - figure 3**), and model selection via AIC  
365 supported modelling (co)variance of sex-specific maternal effects using one of the simplest approaches  
366 considered (electronic supplementary material, model selection, **Table S1**). Specifically, we specified  
367 maternal effects as maternal identities, which represent maternal composite effects (i.e., combining  
368 putative maternal environmental and maternal genetic effects). In our case, maternal environmental  
369 effects may also encompass common environmental effects due to initial common rearing of full-sibs from  
370 the same egg sac. We thus modelled sex-specific additive genetic ( $a$ ), maternal ( $m$ ), and residual effects  
371 ( $e$ ). For both direct genetic and maternal effects, between-sex covariances can be estimated, whereas this

372 is not possible for the residuals. Accordingly, the assumed multivariate normally distributed random-  
373 effect covariance structures for female (F) and male (M) effects with means of zero followed for  $a$ :  
374  $\begin{bmatrix} \sigma_{a_F}^2 & \sigma_{a_{F,M}}^2 \\ \sigma_{a_{F,M}}^2 & \sigma_{a_M}^2 \end{bmatrix} \otimes A$ , for  $m$ :  $\begin{bmatrix} \sigma_{m_F}^2 & \sigma_{m_{F,M}}^2 \\ \sigma_{m_{F,M}}^2 & \sigma_{m_M}^2 \end{bmatrix} \otimes I$ , and for  $e$ :  $\begin{bmatrix} \sigma_{e_F}^2 & 0 \\ 0 & \sigma_{e_M}^2 \end{bmatrix} \otimes I$ , whereby  $A$  is the pedigree-  
375 derived additive relationship matrix and  $I$  the identity matrix .

376 We also fitted fixed sex effects and interactions of these sex effects with all other fixed effects that  
377 were similar to all candidate models. Specifically, we fitted fixed effects for i) overall sex means (*sex*;  
378 female or male), ii) seasonal trends (*date*; integer between 1 and 366, and *sex-by-date*), iii) maternal food  
379 treatment (*maternal food*; low or high, and *sex-by-maternal food*), and iii) experimental period effects  
380 (*period*; first or second three-year period, and *sex-by-period*) in respect to the maternal food treatment  
381 because the *maternal food* was applied only during the last three of the total six years. We fitted the  
382 seasonal trends because development of some spider species, including *Nephilingis*, is affected by day-  
383 (or night-) length, i.e., by season [35, 36]. All full siblings hatched on the same day so that season effects  
384 may be regarded as either environmentally induced maternal effects or as seasonal common  
385 environmental effects, which we wanted to account for here. The *date* trends thus served as general  
386 surrogates to many aspects of seasonal day-light variation (**Figure 1**) and enable a more meaningful  
387 between-sex comparison by regressing to the common average hatch date.

388 We modelled adult body mass on the log scale (Ln) because adult body size results from past growth  
389 (which may be a proportional process), and the log-scale efficiently accounts for scaling effects both  
390 within and between sexes. Within sexes, model residuals based on untransformed data showed a right  
391 skew and their variance increased with the fitted values, which also implies variance heterogeneity across  
392 seasons (see also raw data in **Figure 1**). Between sexes, the sex-ratio of the untransformed sex-specific  
393 standard deviations was of the same magnitude as the ratio of the untransformed sex-specific means  
394 (female to male ratio was 56 for standard deviations and 75 for means). The log-transformation stabilized  
395 variances both within and between sexes, which accordingly refer to variation in proportional size

396 differences conditional on fitted fixed effects (sex-specific geometric means and systematic trends). Note  
397 that an alternatively considered scaling of these mass records, either within or across sexes, does not  
398 stabilize variances as does the log transformation. The response vector of natural logarithm of adult body  
399 mass ( $y$ ) was modelled as:

$$400 \quad y = Xb + Z_1a + Z_2m + e \quad (1),$$

401 where  $X$  and  $Z$  are the design matrices linking data with the fixed and random effects, respectively.

402 Based on the estimated variance components we calculated the relative contributions per sex ( $s$ ;  
403 either female, F, or male, M) of the direct genetic effect variance ( $\hat{\sigma}_{a_s}^2$ ) to the total phenotypic variance  
404 ( $\hat{\sigma}_{P_s}^2$ ), i.e., the heritability ( $h^2$ ), as  $\hat{h}_s^2 = \hat{\sigma}_{a_s}^2 / \hat{\sigma}_{P_s}^2$ , and the corresponding contribution of the maternal  
405 effect variance ( $\sigma_m^2$ ), as  $\hat{m}_s^2 = \hat{\sigma}_{m_s}^2 / \hat{\sigma}_{P_s}^2$ , where  $\hat{\sigma}_{P_s}^2 = \hat{\sigma}_{a_s}^2 + \hat{\sigma}_{m_s}^2 + \hat{\sigma}_{e_s}^2$ , and  $\hat{\sigma}_{e_s}^2$  is the sex-specific residual  
406 variance estimate. We calculated between-sex correlations ( $R_{F,M}$ ) for genetic ( $R_{a_{F,M}}$ ) and maternal  
407 effects ( $R_{m_{F,M}}$ ) based on the estimates for between-sex covariance ( $\widehat{cov}_{F,M}$ ) and the sex-specific variances  
408 ( $\hat{\sigma}_F^2, \hat{\sigma}_M^2$ ), as  $\hat{R}_{F,M} = \widehat{cov}_{F,M} / \sqrt{\hat{\sigma}_F^2 * \hat{\sigma}_M^2}$ . For (co)variance (-based) parameter estimates constrained by  
409 boundaries ( $\hat{\sigma}^2, \hat{R}, \hat{h}^2, \hat{m}^2$ ), we approximated confidence intervals based on 10,000 parametric bootstrap  
410 replicates (electronic supplementary material, parametric bootstraps). We fitted models using residual  
411 maximum likelihood (REML) via the average information algorithm implemented in ASReml-R v. 4.1.0.176  
412 [63], executed in R v. 4.1.2, and tested fixed effects using  $F$ -tests with adjusted denominator degrees of  
413 freedom [64].

## 414 Data accessibility

415 Underlying data and R-scripts (R Markdown file) are available on the Dryad Digital Repository:  
416 <https://doi.org/10.5061/dryad.tb2rbp039> (during review:  
417 [https://datadryad.org/stash/share/pXD8qttGbQKGrosfkma4VPY8\\_4cdQkIDWr4qeMxCNI](https://datadryad.org/stash/share/pXD8qttGbQKGrosfkma4VPY8_4cdQkIDWr4qeMxCNI)). We also  
418 provide a html output file of the R Markdown file during review.

## 419 **Conflict of interest declaration**

420 We declare no competing interests.

## 421 **Funding**

422 This research was supported by the Slovenian Research Agency (grants P1-0236, P1-0255, J1-9163, J1-  
423 6729).

## 424 **Authors' contributions**

425 S.K.-F.: funding acquisition, project administration, conceptualization, methodology, supervision,  
426 investigation, resources, data curation, writing – original draft, review & editing; M.K.: funding acquisition,  
427 resources, writing – review & editing, P.V.D.: methodology, investigation, resources, data curation, formal  
428 analysis, visualization, validation, writing – original draft, review & editing.

## 429 **Acknowledgements**

430 We thank R. Golobinek, J. Šet, E. Turk, T. Lokovšek, K. Čandek, M. Gregorič and S. Quinones-Lebron for  
431 helping with spider collection, rearing, and data recording.

## 432 **References**

- 433 1. Darwin C. 1871 Principles of Sexual Selection. In *The Descent of Man, and Selection in Relation to*  
434 *Sex*. pp. 253-320. London, John Murray.
- 435 2. Arnqvist G., Rowe L. 2005 Sexual Conflict in Nature. In *Sexual Conflict* (eds. Arnqvist G., Rowe L.),  
436 pp. 1-13. Princeton, New Jersey, Princeton University Press.
- 437 3. Hosken D.J., Archer C.R., Mank J.E. 2019 Sexual conflict. *Curr Biol* **29**(11), R451-R455.  
438 (doi:10.1016/j.cub.2019.03.052).
- 439 4. Tregenza T., Wedell N., Chapman T. 2006 Introduction. Sexual conflict: a new paradigm? *Philos*  
440 *Trans R Soc Lond B Biol Sci* **361**(1466), 229-234. (doi:10.1098/rstb.2005.1796).
- 441 5. Slatkin M. 1984 Ecological causes of sexual dimorphism. *Evolution* **38**(3), 622-630.  
442 (doi:10.2307/2408711).
- 443 6. Lande R. 1980 Sexual dimorphism, sexual selection, and adaptation in polygenic characters.  
444 *Evolution* **34**(2), 292-305. (doi:10.2307/2407393).

- 445 7. Martins M.J.F., Puckett T.M., Lockwood R., Swaddle J.P., Hunt G. 2018 High male sexual investment  
446 as a driver of extinction in fossil ostracods. *Nature* **556**(7701), 366-369. (doi:10.1038/s41586-018-  
447 0020-7).
- 448 8. Cally J.G., Stuart-Fox D., Holman L. 2019 Meta-analytic evidence that sexual selection improves  
449 population fitness. *Nat Commun* **10**(1), 2017. (doi:10.1038/s41467-019-10074-7).
- 450 9. Sayadi A., Martinez Barrio A., Immonen E., Dainat J., Berger D., Tellgren-Roth C., Nystedt B., Arnqvist  
451 G. 2019 The genomic footprint of sexual conflict. *Nat Ecol Evol* **3**(12), 1725-1730.  
452 (doi:10.1038/s41559-019-1041-9).
- 453 10. Gavrillets S. 2014 Is sexual conflict an "engine of speciation"? *Cold Spring Harb Perspect Biol* **6**(12),  
454 a017723. (doi:10.1101/cshperspect.a017723).
- 455 11. Wright A.E., Rogers T.F., Fumagalli M., Cooney C.R., Mank J.E. 2019 Phenotypic sexual dimorphism  
456 is associated with genomic signatures of resolved sexual conflict. *Mol Ecol* **28**(11), 2860-2871.  
457 (doi:10.1111/mec.15115).
- 458 12. Hedrick A.V., Temeles E.J. 1989 The evolution of sexual dimorphism in animals: Hypotheses and  
459 tests. *Trends Ecol Evol* **4**(5), 136-138. (doi:10.1016/0169-5347(89)90212-7).
- 460 13. Shine R. 1989 Ecological causes for the evolution of sexual dimorphism: a review of the evidence.  
461 *Q Rev Biol* **64**(4), 419-461. (doi:10.1086/416458).
- 462 14. Chapman T. 2006 Evolutionary conflicts of interest between males and females. *Curr Biol* **16**(17),  
463 R744-754. (doi:10.1016/j.cub.2006.08.020).
- 464 15. Mank J.E. 2017 Population genetics of sexual conflict in the genomic era. *Nat Rev Genet* **18**(12),  
465 721-730. (doi:10.1038/nrg.2017.83).
- 466 16. Poissant J., Wilson A.J., Coltman D.W. 2010 Sex-specific genetic variance and the evolution of sexual  
467 dimorphism: a systematic review of cross-sex genetic correlations. *Evolution* **64**(1), 97-107.  
468 (doi:10.1111/j.1558-5646.2009.00793.x).
- 469 17. Parker G.A. 1979 Sexual Selection and Sexual Conflict. In *Sexual Selection and Reproductive*  
470 *Competition in Insects* (eds. Blum M.S., Blum N.A.), pp. 123-166. New York, Academic Press, Inc.
- 471 18. Bateman A.J. 1948 Intra-sexual selection in *Drosophila*. *Heredity (Edinb)* **2**, 349-368.  
472 (doi:10.1038/hdy.1948.21).
- 473 19. Cox R. 2017 Sexual Size Dimorphism. In *Encyclopedia of Evolutionary Psychological Science* (eds. T.  
474 S., V. W.-S.), pp. 1-6, Springer. (doi:10.1007/978-3-319-16999-6\_1678-1).
- 475 20. Cox R.M., Calsbeek R. 2009 Sexually antagonistic selection, sexual dimorphism, and the resolution  
476 of intralocus sexual conflict. *Am Nat* **173**(2), 176-187. (doi:10.1086/595841).
- 477 21. Shine R. 1988 The evolution of large body size in females: a critique of Darwin's "fecundity  
478 advantage" model. *The American Naturalist* **131**(1), 124-131. (doi:10.1086/284778).
- 479 22. McGlothlin J.W., Cox R.M., Brodie E.D. 2019 Sex-specific selection and the evolution of between-  
480 sex genetic covariance. *J Hered* **110**(4), 422-432. (doi:10.1093/jhered/esz031).
- 481 23. Turk E., Kuntner M., Kralj-Fiser S. 2017 Cross-sex genetic correlation does not extend to sexual size  
482 dimorphism in spiders. *Naturwissenschaften* **105**(1-2), 1. (doi:10.1007/s00114-017-1529-6).

- 483 24. Badyaev A.V. 2002 Growing apart: an ontogenetic perspective on the evolution of sexual size  
484 dimorphism. *Trends Ecol Evol* **17**(8), 369-378. (doi:10.1016/S0169-5347(02)02569-7).
- 485 25. Bonduriansky R., Chenoweth S.F. 2009 Intralocus sexual conflict. *Trends Ecol Evol* **24**(5), 280-288.  
486 (doi:10.1016/j.tree.2008.12.005).
- 487 26. Räsänen K., Kruuk L.E.B. 2007 Maternal effects and evolution at ecological time-scales. *Funct Ecol*  
488 **21**(3), 408-421. (doi:10.1111/j.1365-2435.2007.01246.x).
- 489 27. Wolf J.B., Wade M.J. 2009 What are maternal effects (and what are they not)? *Philos Trans R Soc*  
490 *Lond B Biol Sci* **364**(1520), 1107-1115. (doi:10.1098/rstb.2008.0238).
- 491 28. Willham R.L. 1980 Problems in estimating maternal effects. *Livest Prod Sci* **7**(5), 405-418.  
492 (doi:10.1016/0301-6226(80)90080-9).
- 493 29. Willham R.L. 1963 The covariance between relatives for characters composed of components by  
494 related individuals. *Biometrics* **19**(1), 18-27. (doi:10.2307/2527570 ).
- 495 30. Fox C.W., Czesak M.E., Wallin W.G. 2004 Complex genetic architecture of population differences in  
496 adult lifespan of a beetle: nonadditive inheritance, gender differences, body size and a large  
497 maternal effect. *J Evol Biol* **17**(5), 1007-1017. (doi:10.1111/j.1420-9101.2004.00752.x).
- 498 31. Badyaev A.V., Beck M.L., Hill G.E., Whittingham L.A. 2003 The evolution of sexual size dimorphism  
499 in the house finch. V. Maternal effects. *Evolution* **57**(2), 384-396. (doi:10.1111/j.0014-  
500 3820.2003.tb00272.x).
- 501 32. Badyaev A.V. 2005 Maternal inheritance and rapid evolution of sexual size dimorphism: passive  
502 effects or active strategies? *Am Nat* **166 Suppl 4**, S17-30. (doi:10.1086/444601).
- 503 33. Hanrahan J.P., Eisen E.J. 1973 Sexual dimorphism and direct and maternal genetic effects on body  
504 weight in mice. *Theor Appl Genet* **43**(1), 39-45. (doi:10.1007/BF00277832).
- 505 34. Kuntner M., Coddington J.A. 2020 Sexual size dimorphism: evolution and perils of extreme  
506 phenotypes in spiders. *Annu Rev Entomol* **65**, 57-80. (doi:10.1146/annurev-ento-011019-025032).
- 507 35. Šet J., Turk E., Golobinek R., Lokovšek T., Gregorič M., Lebrón S.G.Q., Kuntner M., Haddad C.R.,  
508 Čandek K., Kralj-Fišer S. 2021 Sex-specific developmental trajectories in an extremely sexually size  
509 dimorphic spider. *Naturwissenschaften* **108**(6), 54. (doi:10.1007/s00114-021-01754-w).
- 510 36. Kuntner M., Rudolf E., Cardoso P. 2017 *Nephilingis cruentata*. The IUCN Red List of Threatened  
511 Species 2017: e.T80274336A80274370. ((doi:10.2305/IUCN.UK.2017-  
512 1.RLTS.T80274336A80274370.en).
- 513 37. Kuntner M. 2007 A monograph of *Nephilengys*, the pantropical 'hermit spiders' (Araneae,  
514 Nephilidae, Nephilinae). *Syst Entomol* **32**(1), 95-135. (doi:10.1111/j.1365-3113.2006.00348.x).
- 515 38. Quiñones-Lebrón S.G., Kuntner M., Kralj-Fišer S. 2021 The effect of genetics, diet, and social  
516 environment on adult male size in a sexually dimorphic spider. *Evol Ecol* **35**(2), 217-234.  
517 (doi:10.1007/s10682-020-10097-3).
- 518 39. Lopez-Cortegano E. 2021 purgeR: Inbreeding and purging in pedigreed populations. *Bioinformatics*.  
519 (doi:10.1093/bioinformatics/btab599).
- 520 40. Whitehouse M.E., Lubin Y. 2005 The functions of societies and the evolution of group living: spider

- 521 societies as a test case. *Biological Reviews* **80**(3), 347-361. (doi:10.1017/s1464793104006694).
- 522 41. Foelix R.F. 2011 *Biology of Spiders*. New York, Oxford University Press; 419 p.
- 523 42. Henderson C.R. 1973 Sire evaluation and genetic trends. *J Anim Sci* **1973**(Symposium), 10-41.  
524 (doi:/1973.1973Symposium10x).
- 525 43. Kruuk L.E., Hadfield J.D. 2007 How to separate genetic and environmental causes of similarity  
526 between relatives. *J Evol Biol* **20**(5), 1890-1903. (doi:10.1111/j.1420-9101.2007.01377.x).
- 527 44. Schaefer M. 1977 Winter ecology of spiders (Araneida). *Zeitschrift Für Angewandte Entomologie*  
528 **83**(2), 113-134. (doi:10.1111/j.1439-0418.1977.tb02381.x).
- 529 45. Butler D.G., Cullis B.R., Gilmour A.R., Gogel B.J., Thompson R. 2018 ASReml-R Reference Manual  
530 Version 4. p. 188. Hemel Hempstead, HP2 4TP, UK, VSN International Ltd.
- 531 46. Kenward M.G., Roger J.H. 1997 Small sample inference for fixed effects from restricted maximum  
532 likelihood. *Biometrics* **53**(3), 983-997. (doi:10.2307/2533558).
- 533 47. Wyman M.J., Stinchcombe J.R., Rowe L. 2013 A multivariate view of the evolution of sexual  
534 dimorphism. *J Evol Biol* **26**(10), 2070-2080. (doi:10.1111/jeb.12188).
- 535 48. Cheng C., Houle D. 2020 Predicting multivariate responses of sexual dimorphism to direct and  
536 indirect selection. *Am Nat* **196**(4), 391-405. (doi:10.1086/710353).
- 537 49. Houle D. 1992 Comparing evolvability and variability of quantitative traits. *Genetics* **130**(1), 195-  
538 204. (doi:10.1093/genetics/130.1.195).
- 539 50. Hansen T.F., Pélabon C., Houle D. 2011 Heritability is not evolvability. *Evolutionary Biology* **38**(3),  
540 258-277. (doi:10.1007/s11692-011-9127-6).
- 541 51. Bonduriansky R., Day T. 2009 Nongenetic inheritance and its evolutionary implications. *Annual*  
542 *Review of Ecology Evolution and Systematics* **40**(1), 103-125.  
543 (doi:10.1146/annurev.ecolsys.39.110707.173441).
- 544 52. Lindholm A.K., Hunt J., Brooks R. 2006 Where do all the maternal effects go? Variation in offspring  
545 body size through ontogeny in the live-bearing fish *Poecilia parae*. *Biol Lett* **2**(4), 586-589.  
546 (doi:10.1098/rsbl.2006.0546).
- 547 53. Kruuk L.E., Livingston J., Kahn A., Jennions M.D. 2015 Sex-specific maternal effects in a viviparous  
548 fish. *Biol Lett* **11**(8). (doi:10.1098/rsbl.2015.0472).
- 549 54. Moore M.P., Whiteman H.H., Martin R.A. 2019 A mother's legacy: the strength of maternal effects  
550 in animal populations. *Ecol Lett* **22**(10), 1620-1628. (doi:10.1111/ele.13351).
- 551 55. Gauzere J., Pemberton J.M., Morris S., Morris A., Kruuk L.E.B., Walling C.A. 2020 The genetic  
552 architecture of maternal effects across ontogeny in the red deer. *Evolution* **74**(7), 1378-1391.  
553 (doi:10.1111/evo.14000).
- 554 56. Wilson A.J., Coltman D.W., Pemberton J.M., Overall A.D., Byrne K.A., Kruuk L.E. 2005 Maternal  
555 genetic effects set the potential for evolution in a free-living vertebrate population. *J Evol Biol* **18**(2),  
556 405-414. (doi:10.1111/j.1420-9101.2004.00824.x).
- 557 57. Bijma P. 2006 Estimating maternal genetic effects in livestock. *J Anim Sci* **84**(4), 800-806.

- 558 (doi:10.2527/2006.844800x).
- 559 58. Rice W.R. 1984 Sex chromosomes and the evolution of sexual dimorphism. *Evolution* **38**(4), 735-  
560 742. (doi:10.1111/j.1558-5646.1984.tb00346.x).
- 561 59. Araújo D., Cella M.D., Brescovit D.A. 2005 Cytogenetic analysis of the neotropical spider  
562 *Nephilengys cruentata* (Araneomorphae, Tetragnathidae): standard staining norms, C-bands and  
563 base-specific fluorochromes. *Braz J Biol* **65**(2), 193-202. (doi:10.1590/s1519-69842005000200002).
- 564 60. Araujo D., Schneider M.C., E. P.-N., Cella D.M. 2012 Sex Chromosomes and Meiosis in Spiders: A  
565 Review. In *Meiosis - Molecular Mechanisms and Cytogenetic Diversity* (ed. Swan A.), p. 22. Rijeka,  
566 Croatia, InTech.
- 567 61. Mousseau T.A., Fox C.W. 1998 The adaptive significance of maternal effects. *Trends Ecol Evol*  
568 **13**(10), 403-407. (doi:10.1016/S0169-5347(98)01472-4).
- 569 62. Bernardo J. 1996 Maternal effects in animal ecology. *Am Zool* **36**(2), 83-105.  
570 (doi:10.1093/icb/36.2.83).
- 571 63. Cordellier M., Schneider J.M., Uhl G., Posnien N. 2020 Sex differences in spiders: from phenotype  
572 to genomics. *Dev Genes Evol* **230**(2), 155-172. (doi:10.1007/s00427-020-00657-6).
- 573 64. Teder T. 2014 Sexual size dimorphism requires a corresponding sex difference in development time:  
574 a meta-analysis in insects. *Funct Ecol* **28**(2), 479-486. (doi:10.1111/1365-2435.12172).
- 575



576 **Appendix 1**

577 **Model selection.**

578 We selected the variance structure of the statistical model based on an established model selection  
 579 criterion (AIC) applied to three candidate models. The models were specified with equal fixed effects (see  
 580 main text), but different random effects and the complexity of their covariance structures (**Appendix 1 -**  
 581 **table 1**). All models estimated sex-specific variance components underlying direct additive genetic ( $a$ ) and  
 582 residual effects ( $e$ ) as described in the main text. However, sex-specific maternal effects ( $m$ ) we specified  
 583 as either (or both) maternal environmental effects ( $me$ ), via including a maternal id term, or as maternal  
 584 genetic effects ( $mg$ ), via a maternal id term and linking ids to the inverse of the pedigree-derived  
 585 relationship matrix (similarly to what is described in the main text for direct additive genetic effects). We  
 586 also fitted models with covariances between sex-specific direct genetic and sex-specific maternal genetic  
 587 effects, which here combines the 2 x 2 covariance matrices for  $a$  and  $m$  to a 4 x 4 covariance matrix:

$$588 \begin{bmatrix} \sigma_{a_F}^2 & \sigma_{a_{F,M}} & \sigma_{a_F,mg_F} & \sigma_{a_F,mg_M} \\ \sigma_{a_{F,M}} & \sigma_{a_M}^2 & \sigma_{a_M,mg_F} & \sigma_{a_M,mg_M} \\ \sigma_{a_F,mg_F} & \sigma_{a_M,mg_F} & \sigma_{mg_F}^2 & \sigma_{mg_{F,M}} \\ \sigma_{a_F,mg_M} & \sigma_{a_M,mg_M} & \sigma_{mg_{F,M}} & \sigma_{mg_M}^2 \end{bmatrix} \otimes A \quad (A1).$$

589 Fitting the covariance(s) between direct genetic and maternal genetic effects may be important  
 590 because the maternal and direct genetic variance estimates may be biased if the covariance(s), if present,  
 591 remain unaccounted.

592 We were unable to consistently fitting models with both maternal environmental and maternal  
 593 genetic effects. Specifically, results depended on starting values, yielding higher or lower log likelihoods  
 594 than less complex, nested models, and fitting often aborted because of detected singularities. Thus, we  
 595 do not report results on models including both types of maternal effects.

596 The model with maternal environmental effects yielded the lowest AIC (model 1, **Appendix 1 - table**  
 597 **1**), why we reported major results based on this model. Nonetheless, fitting a model with maternal genetic

598 effects and a covariances between direct genetic and maternal genetic effects (model 3) indicated that if  
599 maternal effects are at least partly genetic and this covariance is omitted (which was estimated to be  
600 negative) additive genetic variance of females may be underestimated considerably (**Appendix 1 - figure**  
601 **1**) and also female heritability for adult body size (**Appendix 1 - figure 2**). However, estimates based on  
602 model 3 also showed high estimate uncertainties for the female direct genetic and residual (co)variance  
603 estimates (**Appendix 1 - figure 1**). The strong uncertainty of female relative to male estimates may be  
604 explained by fewer records in females than males, and because of a much higher ratio of direct genetic to  
605 maternal genetic variance in females, plus an estimated negative covariance between direct genetic and  
606 maternal genetic effects – all are expected to lower estimate precision [1].

607 It should be noted that results based on the alternative models (models 2 & 3) support the conclusion  
608 made in the main text about sex differences in adult body size architecture. Specifically, results based on  
609 models fitting maternal genetic effects suggested even higher genetic and lower maternal contributions  
610 to body size in females and higher maternal and lower genetic contributions in males (**Appendix 1 –**  
611 **figures 1,2**)

## 612 **Data simulations.**

613 Disentangling maternal environmental from maternal genetic effects requires many data and specific  
614 pedigree connections [1-4]. Therefore, we evaluated whether the data and pedigree structures are  
615 sufficient to do so. Specifically, we were interested whether we can disentangle between sex-specific  
616 maternal genetic effects ( $m_g$ ) and sex-specific maternal environmental ( $m_e$ ) effects. To do so, we used  
617 Monte Carlo simulations in which we simulated effects for one variance component at the time: either  
618 for additive genetic effects ( $a$ ), maternal genetic effects ( $mg$ ), or maternal environmental effects ( $me$ ).  
619 Using the simulated data, we then fitted three models to each data type to estimate, in addition to  
620 residual variance, either one variance (the simulated component) or two variance components (the  
621 simulated plus one of the two non-simulated components).

622 For data simulations, we neglected the fixed effects of the model, except for sex-effects, and  
623 generated multivariate sex-specific random effects for either  $a$ ,  $mg$ , or  $me$ , and always for residuals ( $e$ ),  
624 whereby we drew the sex-specific random effects for  $a$ ,  $mg$ , and  $me$  from a multivariate normal  
625 distribution with variance for each sex of 0.25 and a between-sex covariance of 0.125 (i.e., a between-sex  
626 correlation of 0.5). Sex-specific residuals were always drawn independently among all individuals from a  
627 normal distribution with variance of 0.75. Sex-specific  $a$  and  $mg$  were drawn independently among  
628 founders and their inheritance was simulated following Mendelian expectations. In detail, all offspring  
629 inherit the average of the sex-specific (direct or maternal) genetic effects from both their parents plus a  
630 random Mendelian sampling effect drawn from a multivariate normal distribution with half the variance  
631 (and half the between-sex covariance) as the founder genetic effects. Thus, the common sex-specific  
632 effect each parent passes on to all its sex-specific offspring consist of half of the sum of their average  
633 parental sex-specific effects, and each offspring is assigned an own random Mendelian sampling effect,  
634 which together make up the (direct or maternal) genetic effect of the offspring. Please note that both  
635 males and females inherit sex-specific direct and maternal genetic effects to offspring of both sexes. In  
636 contrast, sex-specific  $me$  were drawn independently among all dams and assigned to their sex-specific

637 offspring. All sons or daughters expressed their own sex-specific direct genetic effect but the sex-specific  
638 maternal environmental or maternal genetic effect of their mother, i.e., expressed sex-specific maternal  
639 effects were common among brothers or sisters.

640       Based on model estimates for simulated data, we concluded that our data and pedigree structures  
641 are insufficient to reliably disentangle the two maternal effect types. Specifically, simulated maternal  
642 environmental effects (*me*) were misinterpreted as (non-simulated) maternal genetic effects (*mg*), but  
643 not *vice versa* (**Appendix 1 - figure 3**). Thus, for our data, we must consider that if maternal environmental  
644 variance is truly present, maternal genetic variance may be detected statistically even when truly absent.  
645

646 **Parametric bootstraps.**

647 Because confidence intervals for bounded parameters, such as (co)variance-ratio-derived parameters  
648 (e.g., correlations, variance proportions) may not be well approximated using frequentists methods (such  
649 as the delta method), we obtained confidence intervals for these parameters using parametric simulations  
650 [5]. For each of 10,000 parametric bootstrap replicates, we neglected the fixed effects of the model except  
651 for sex-effects and generated multivariate random effects for  $a$ ,  $m$ , and  $e$  under the model estimated  
652 (co)variances, whereby sex-specific  $m$  were drawn independently among dams (reflecting maternal  
653 environmental effects) and sex-specific  $a$  were drawn independently among founders. Inheritance of  $a$   
654 was simulated following Mendelian expectations (as described in **data simulations**). We then refitted the  
655 model (as described in the main text; model 1 in Appendix 1 - table 1) to the simulated data, extracted  
656 the (co)variance-ratio-derived parameters, and defined the 95% confidence interval for each parameter  
657 as the interval between the 0.025<sup>th</sup> and 0.975<sup>th</sup> percentiles of the 10,000 estimates.

658 **Appendix 1 - figure 1.**

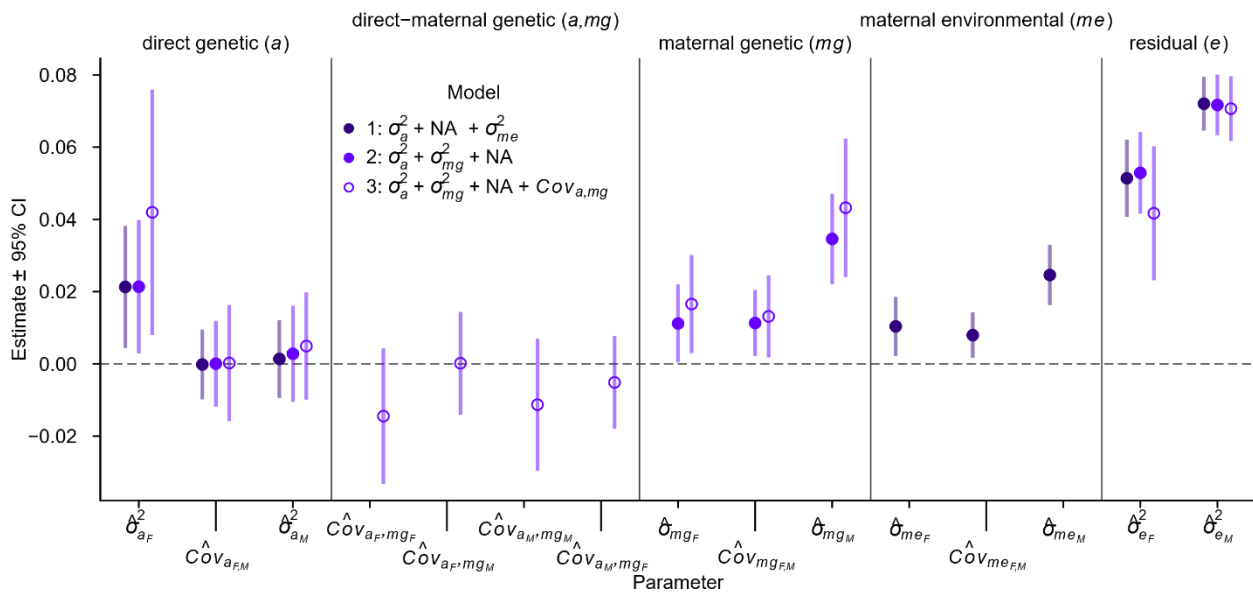

659

660 Variance estimates for log of adult body size based on different models. Sex-specific (co)variance estimates  
 661 based on empirical data using three different models in respect to assuming presence or absence of  
 662 maternal genetic or maternal environmental effects and covariance between sex-specific direct genetic  
 663 effects and sex-specific maternal genetic effects. Different colours differentiate between the models as  
 664 indicated in the legend and results based on model 1 are reported in the results section of the main text.  
 665 Circles indicate the REML estimates and error bars the delta-method approximate 95% confidence  
 666 intervals. We acknowledge that the delta method, unlike the parametric bootstrap method, ignores  
 667 parameter boundaries. Proportional contributions of each variance component to the phenotypic variance  
 668 and correlations are shown in **Appendix 1 - figure 2.**

669 **Appendix 1 - figure 2.**

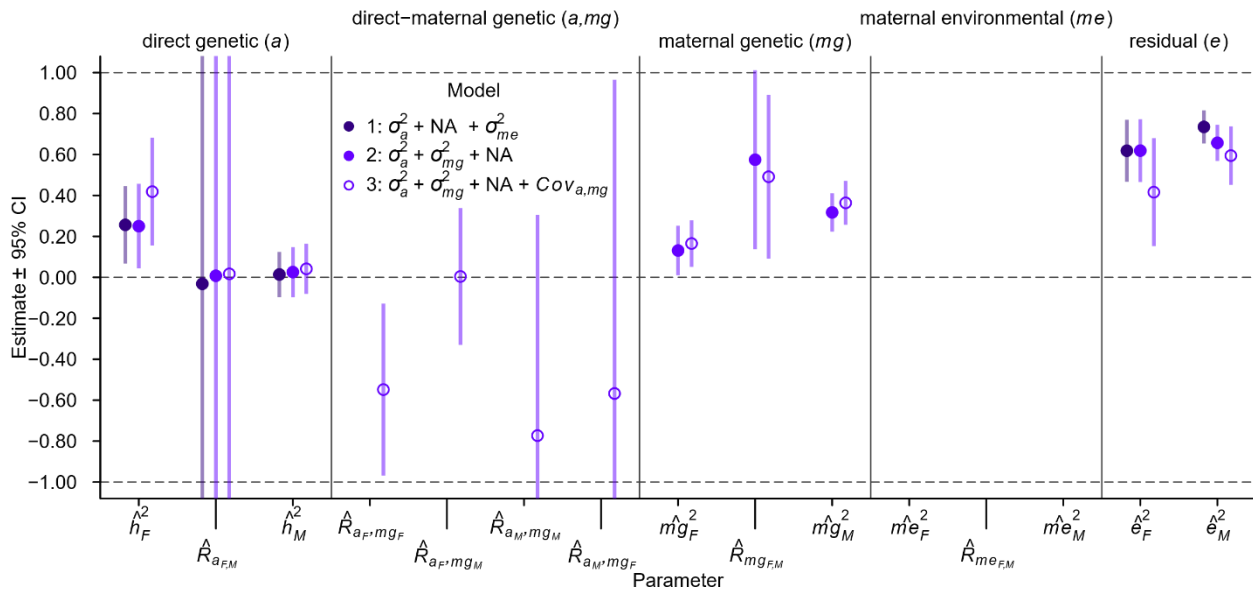

670

671 Contribution of variances for log of adult body size based on different models. Sex-specific estimates for  
 672 proportional contribution to the phenotypic variance and correlations for different random effects based on  
 673 empirical data using three different models (as in **Appendix 1 - figure 1**) in respect to assuming presence  
 674 or absence of maternal genetic or maternal environmental effects and covariance between sex-specific  
 675 direct genetic effects and sex-specific maternal genetic effects. Different colours differentiate between the  
 676 models as indicated in the legend and results based on model 1 are reported in the results section of the  
 677 main text. Circles indicate the estimate with approximate 95% confidence intervals according to the delta-  
 678 method. We acknowledge that the delta method, unlike the parametric bootstrap method, ignores  
 679 parameter boundaries.

680 **Appendix 1 - figure 3.**

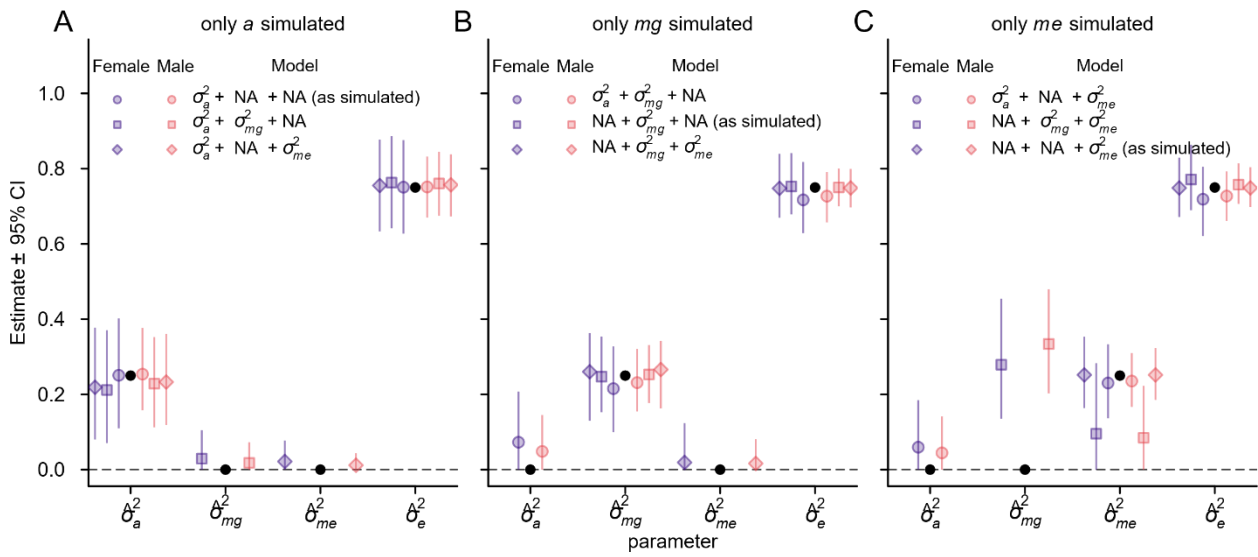

681

682 Data simulation results. Sex-specific variance estimates based on simulated data and using either the  
 683 correct model or incorrect models, each containing one additional non-simulated variance component, to  
 684 assess estimation bias based on the empirical data structure and pedigree. Simulated were sex-specific  
 685 effects underlying residual variance ( $\sigma_e^2$ ) and either direct additive genetic variance (**A**;  $\sigma_a^2$ ) maternal genetic  
 686 variance (**B**;  $\sigma_{mg}^2$ ), or maternal environmental variance (**C**;  $\sigma_{me}^2$ ). Different symbols differentiate between the  
 687 models as indicated in the legend (variances were estimated following the covariance matrices as reported  
 688 in the main manuscript) and simulated variances are indicated by black circles. Error bars show the 95%  
 689 estimate confidence interval across a maximum of 1,000 simulations (convergence of some simulations  
 690 using incorrect models failed). The most pronounced bias is present in (**C**), where the  $\hat{\sigma}_{mg}^2$  interval is well  
 691 away from zero, even though only  $\sigma_{me}^2$  and  $\sigma_e^2$  were simulated (i.e., the confidence interval for the estimate  
 692  $\hat{\sigma}_{mg}^2$  does not cover the true parameter value of  $\sigma_{mg}^2 = 0$ ).



693 **Appendix 1 - figure 4.**

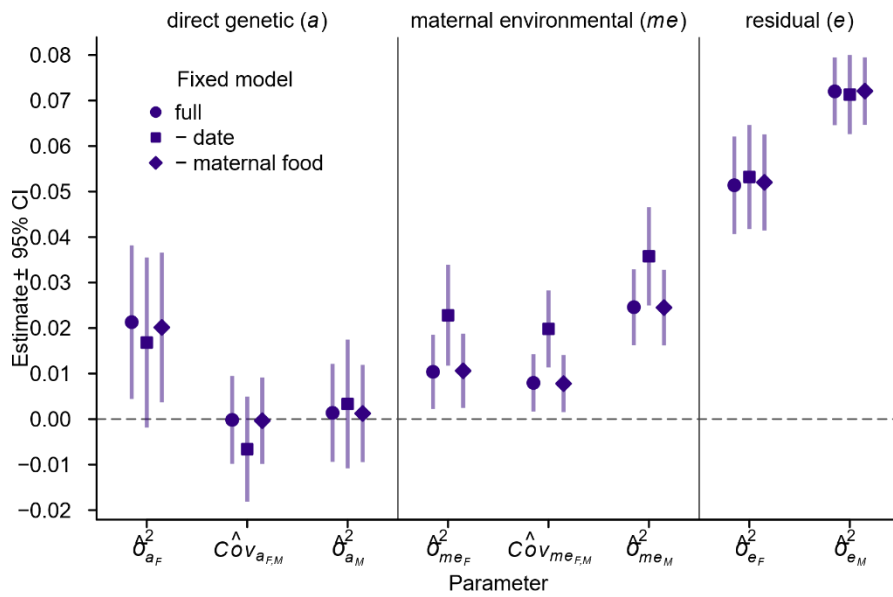

694

695 Some variance estimates for log of adult body size depend on included fixed effects. Sex-specific  
 696 (co)variance estimates based on empirical data for the selected full model (*Full*; model 1 in **Appendix 1 -**  
 697 **figure 1**) and when excluding seasonal trends (- date) or maternal food treatment effects (- maternal food).  
 698 Symbols indicate the REML estimates and error bars the delta-method approximate 95% confidence  
 699 intervals. We acknowledge that the delta method, unlike the parametric bootstrap method, ignores  
 700 parameter boundaries.

701

702 **Appendix 1 - table 1.** Model-selection parameters for three models on log of adult body size, different in  
703 respect to assuming presence or absence of either maternal genetic effects ( $mg$ ) or maternal  
704 environmental effects ( $me$ ), and for the latter covariance between sex-specific direct genetic effects ( $a$ )  
705 and sex-specific maternal genetic effects.

| <b>Model</b> | <b><math>var(a)</math></b> | <b><math>var(mg)</math></b> | <b><math>var(me)</math></b> | <b><math>cov(a, mg)</math></b> | <b><math>k</math></b> | <b><math>logLik</math></b> | <b><math>AIC</math></b> |
|--------------|----------------------------|-----------------------------|-----------------------------|--------------------------------|-----------------------|----------------------------|-------------------------|
| 1*           | +                          | -                           | +                           | -                              | 8                     | 1876.3                     | -3736.5                 |
| 2            | +                          | +                           | -                           | -                              | 8                     | 1871.4                     | -3726.7                 |
| 3            | +                          | +                           | -                           | +                              | 12                    | 1873.6                     | -3723.2                 |

706  $var(a)$ : sex-specific direct additive genetic effect variance including between-sex covariance.  $var(mg)$ :  
707 sex-specific maternal genetic effect variance including between-sex covariance.  $var(me)$ : sex-specific  
708 maternal environmental effect variance including between-sex covariance.  $cov(a, mg)$ : covariances  
709 between sex-specific direct additive genetic effects and sex-specific maternal genetic effects.  $k$ : number  
710 of (co)variance parameters.  $logLik$ : REML estimate of the log likelihood (the higher the better).  $AIC$ :  
711 Akaike's information criterion (the lower the better). \* Chosen model.

712 **Supplementary references**

- 713 1. Gerstmayr S. 1992 Impact of the data structure on the reliability of the estimated genetic  
714 parameters in an animal model with maternal effects. *J Anim Breed Genet* **109**(1-6), 321-336.  
715 (doi:10.1111/j.1439-0388.1992.tb00412.x).
- 716 2. Willham R.L. 1963 The covariance between relatives for characters composed of components by  
717 related individuals. *Biometrics* **19**(1), 18-27. (doi:10.2307/2527570 ).
- 718 3. Willham R.L. 1980 Problems in estimating maternal effects. *Livest Prod Sci* **7**(5), 405-418.  
719 (doi:10.1016/0301-6226(80)90080-9).
- 720 4. Bijma P. 2006 Estimating maternal genetic effects in livestock. *J Anim Sci* **84**(4), 800-806.  
721 (doi:10.2527/2006.844800x).
- 722 5. van der Leeden R., Busing F.M., Meijer E. 1997 Bootstrap methods for two-level models. In  
723 *Multilevel Conference* (p. 26. Amsterdam, Netherlands).
